# Supplementary material
Source: publisher figshare collection journal article supplement (https://karger.figshare.com/ndownloader/files/8716183)
Supplement: Supplementary file 1 [file 8716183]

| **Study** | **Q1** | **Q2** | **Q3** | **Q4** | **Q5** | **Q6** | **Q7** | **Q8** | **Q9** | **Q10** | **Quality Score** |
| --- | --- | --- | --- | --- | --- | --- | --- | --- | --- | --- | --- |
| **Algeria** | | | | | | | | | | | |
| Hecham [41] | No | Yes | No | Yes | Yes | Yes | Yes | Yes | Yes | NA | 7/9 |
| **Iraq** | | | | | | | | | | | |
| Hasan [42] | No | Yes | No | No | Yes | Yes | Yes | Yes | Yes | NA | 6/9 |
| Hasan et al [57] | No | Yes | No | No | Yes | Yes | Yes | Yes | Yes | NA | 6/9 |
| Al-Hamadani et al [43] | No | Yes | No | Yes | Yes | Yes | Yes | Yes | Yes | NA | 7/9 |
| Al-Araji et al [44] | No | Yes | Yes | Yes | Yes | Yes | Yes | Yes | Yes | NA | 8/9 |
| **Jordan** | | | | | | | | | | | |
| Bahou [45] | No | Yes | No | Yes | Yes | Yes | Yes | Yes | Yes | Yes | 8/10 |
| **Kuwait** | | | | | | | | | | | |
| Alroughani et al [55] | Yes | Yes | Yes | Yes | Yes | Yes | Yes | Yes | Yes | Yes | 10/10 |
| Alshubaili et al [46] | Yes | Yes | No | Yes | Yes | Yes | Yes | Yes | Yes | Yes | 9/10 |
| **Lebanon** | | | | | | | | | | | |
| Yamout et al [47] | Yes | Yes | Yes | Yes | Yes | Yes | Yes | Yes | Yes | Yes | 10/10 |
| Sawaya et al [48] | No | Yes | No | Yes | Yes | No | Yes | Yes | Yes | Yes | 7/10 |
| **Oman** | | | | | | | | | | | |
| Tharakan et al [50] | No | Yes | No | Yes | No | Yes | Yes | Yes | Yes | Yes | 7/10 |
| Tharakan et al [49] | No | Yes | No | Yes | Yes | Yes | Yes | Yes | No | Yes | 7/10 |
| **Qatar** | | | | | | | | | | | |
| Deleu et al [10] | Yes | Yes | Yes | Yes | Yes | Yes | Yes | Yes | Yes | Yes | 10/10 |
| Akhtar et al [51] | No | Yes | Yes | Yes | Yes | Yes | Yes | Yes | Yes | Yes | 9/10 |
| **Saudi Arabia** | | | | | | | | | | | |
| Al Deeb [52] | No | Yes | No | Yes | No | Yes | Yes | Yes | Yes | NA | 6/9 |
| Daif et al [53] | No | Yes | No | Yes | Yes | Yes | Yes | Yes | Yes | Yes | 8/10 |
| Yaqub et al [54] | No | Yes | No | Yes | Yes | Yes | Yes | Yes | Yes | Yes | 8/10 |
| **United Arab Emirates** | | | | | | | | | | | |
| Inshasi et al [55] | Yes | No | Yes | Yes | Yes | Yes | Yes | Yes | Yes | Yes | 9/10 |
| Q1: Was the sample representative of the target population?  Q2: Were study participants recruited in an appropriate way?  Q3: Was the sample size adequate?  Q4: Were the study subjects and setting described in detail?  Q5: Is the data analysis conducted with sufficient coverage of the identified sample?  Q6: Were objective, standard criteria used for measurement of the condition?  Q7: Was the condition measured reliably?  Q8: Was there appropriate statistical analysis?  Q9: Are all important confounding factors/ subgroups/differences identified and accounted for?  Q10: Were subpopulations identified using objective criteria? | | | | | | | | | | | |
